# Supplementary material for: CO2 electro-reduction reaction via a two-dimensional TM@TAP single-atom catalyst
Source: Royal Society of Chemistry journal article supplement (doi:10.1039/d3ra06989c), 2023-01-01
Supplement: d3ra06989c1.pdf [file d3ra06989c1.pdf]

## Supporting Information

### Computational Details:

Since the gas-phase thermochemical reaction energies computed by the RPBE functional was obviously deviant from experimental results according previous report,<sup>1,2</sup> it is essential to make a sensitivity analysis based on experimentally determined gas-phase reaction enthalpy. Inspired by the work of Peterson et al.,<sup>2</sup> a similar analysis was performed and shown in Figure S1. We analyzed the reaction enthalpies of 21 reactions including 11 species (see Table S1), and the results of theoretical calculation present that the systematic error found in all species containing OCO backbone, particularly CO<sub>2</sub>, HCOOH, CH<sub>3</sub>COOH, and HCOOCH<sub>3</sub> are obvious. Among all reactions, 14 reactions are influenced by species containing OCO backbone, while the rest reactions are unaffected. As shown in Figure S1, the mean absolute error of unaffected reactions is 0.07 eV, which is small and can be neglected. However, the mean absolute error of affected reactions is 0.26 eV at 0 eV correction, and the optimal correction to OCO-containing species is 0.33 eV with the mean absolute error of 0.04 eV. Based on the above analysis, we apply the correction of 0.33 eV for CO<sub>2</sub> and HCOOH in current work. The adsorbate solvation effects were considered approximately in the same manner as in the previous study.<sup>2-7</sup> Hydroxyl adsorbates (\*OH) and hydroxyl functional groups (\*R-OH) were stabilized 0.5 eV and 0.25 eV, respectively, and the stabilization of \*CO and \*CHO is 0.1 eV. The asterisk (\*) indicates a species bound to the surface. The free energy of gas-phase molecules was calculated under the standard state pressure of 101,325 Pa, while the free energy of liquid-phase molecules, such as H<sub>2</sub>O, HCOOH, CH<sub>3</sub>OH, was computed as ideal gas employing their corresponding vapor fugacity. In this work, a fugacity of 3534 Pa, 19 Pa and 6080 Pa was applied for H<sub>2</sub>O, HCOOH and CH<sub>3</sub>OH,<sup>6,8</sup> respectively. To obtain the cohesion energy, the energy of the bulk metal needs to be calculated. The hexagonal-close-packed structure of Sc, Ti, Co, Zn, Y, Zr, Tc, Ru, Cd, body-centered-cubic structure of V, Cr, Mn, Fe, Nb, Mo, and faced-centered-cubic structure of Ni, Cu, Rh, Pd, Ag were used. The Monkhorst-Pack grids of k-point sampling for each bulk phases using a grid of spacing  $2\pi \times 0.025 \text{ \AA}^{-1}$  in the Brillouin zone. Other calculational details are consistent with the

calculations in the main text.

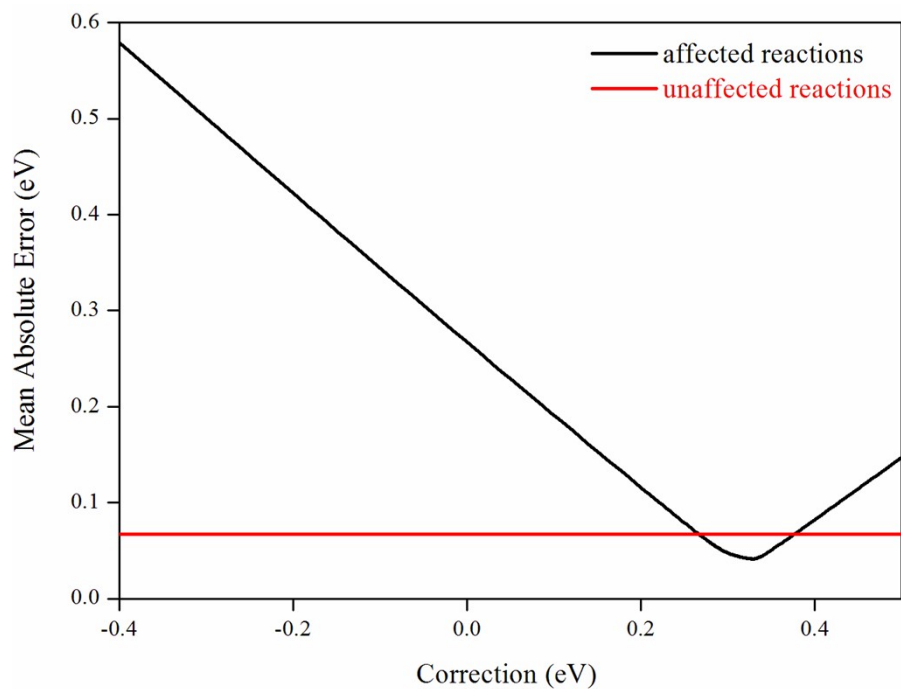

**Fig. S1** Selective analysis for reactions with and without species containing OCO backbone. 'affected reactions' stands for the reactions including  $\text{CO}_2$ ,  $\text{HCOOH}$ ,  $\text{CH}_3\text{COOH}$  and  $\text{HCOOCH}_3$ , while 'unaffected reactions' refers to the rest reactions containing none of these species.

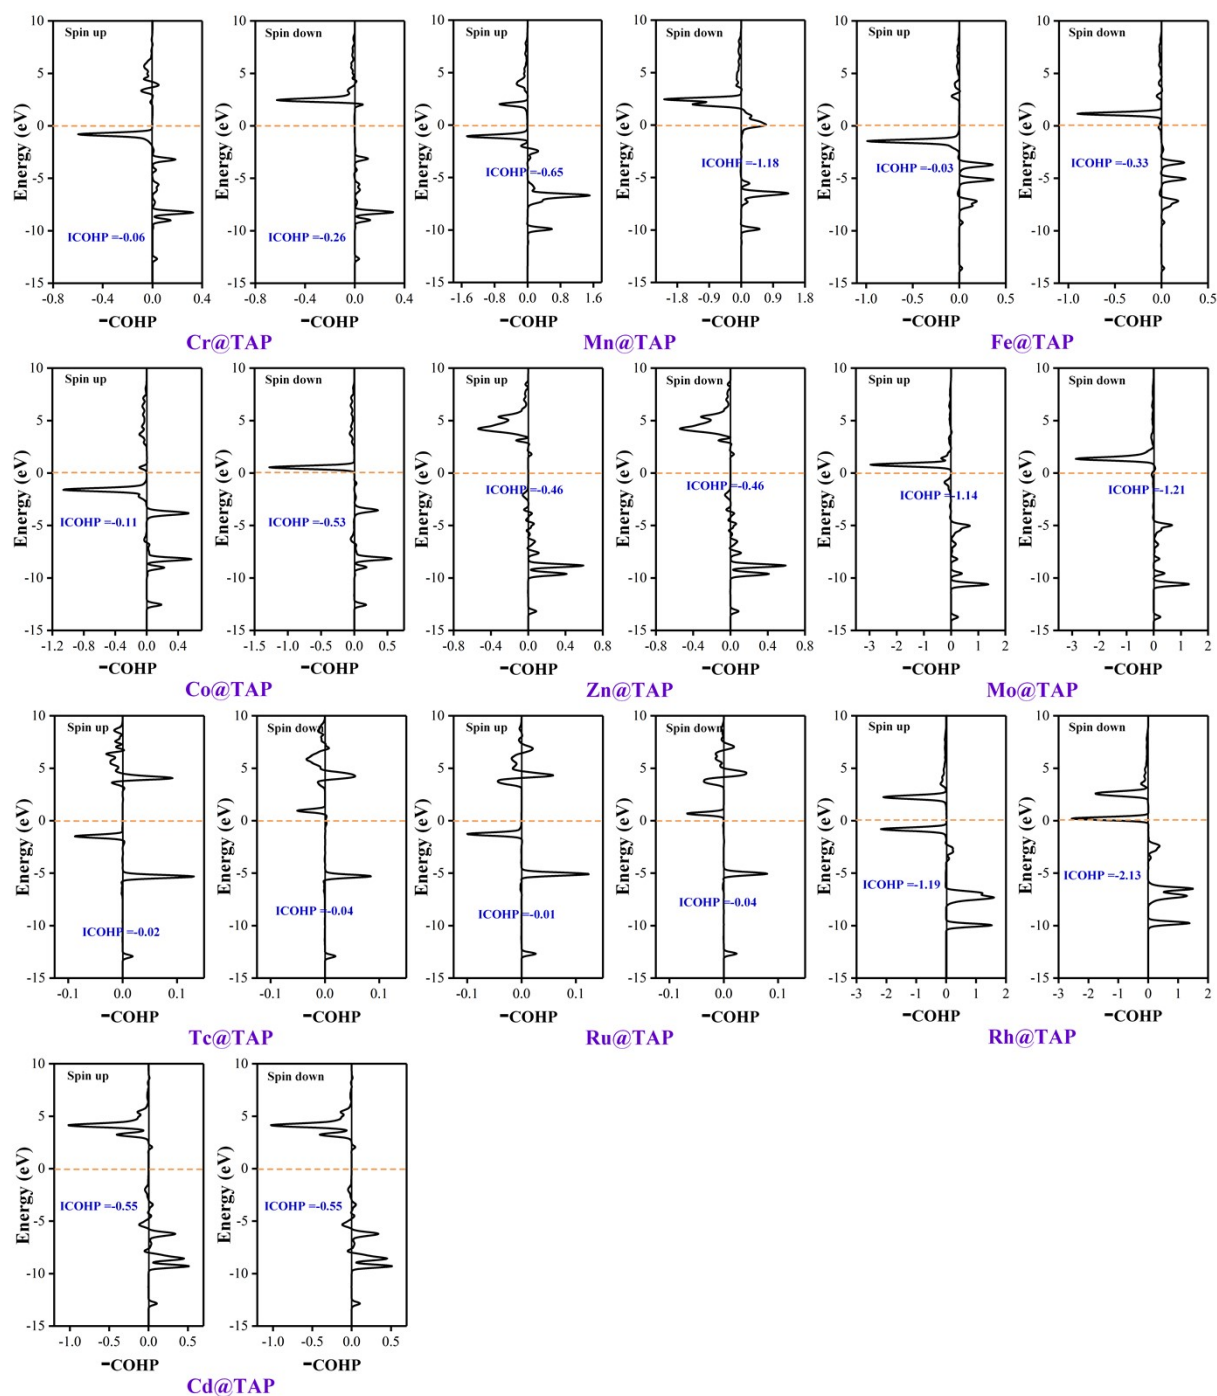

**Fig. S2** The projected crystal orbital Hamilton population (pCOHP) between TM atom and atom of product connected to TM atom. The products of TM@TAP (TM = Cr, Zn, Mo, Cd) are HCOOH. The products of Mn@TAP and Rh@TAP is CO. The products of Tc@TAP and Ru@TAP are CH<sub>4</sub>. The products of Fe@TAP and Co@TAP are CH<sub>3</sub>OH and HCHO, respectively. The dashed line denotes the Fermi level. The bonding and antibonding contributions are displayed on the right and left, respectively.

**Table S1** Reactions equations, the experimental reference enthalpies ( $\Delta H_{\text{ref}}$ ) from NIST,<sup>9</sup> theoretical uncorrected enthalpies ( $\Delta H_{\text{unc}}$ ), corrected enthalpies ( $\Delta H_{\text{cor}}$ ) with +0.33 eV for OCO-containing species, together with absolute error before and after correction. All values are in eV. (at 25 °C and 101325 Pa).

| Reaction                                                                                                | $\Delta H_{\text{ref}}$ | $\Delta H_{\text{unc}}$ | error | $\Delta H_{\text{cor}}$ | error |
|---------------------------------------------------------------------------------------------------------|-------------------------|-------------------------|-------|-------------------------|-------|
| $\text{CO}_2 + \text{H}_2 \rightarrow \text{CO} + \text{H}_2\text{O}$                                   | 0.43                    | 0.81                    | 0.38  | 0.48                    | 0.05  |
| $\text{CO}_2 + 4\text{H}_2 \rightarrow \text{CH}_4 + 2\text{H}_2\text{O}$                               | -1.71                   | -1.37                   | 0.34  | -1.70                   | 0.01  |
| $\text{CO} + 3\text{H}_2 \rightarrow \text{CH}_4 + \text{H}_2\text{O}$                                  | -2.14                   | -2.18                   | -0.04 | -2.18                   | -0.04 |
| $\text{CO}_2 + \text{H}_2 \rightarrow \text{HCOOH}$                                                     | 0.15                    | 0.21                    | 0.06  | 0.21                    | 0.06  |
| $\text{CO} + \text{H}_2\text{O} \rightarrow \text{HCOOH}$                                               | -0.27                   | -0.60                   | -0.33 | -0.27                   | 0.00  |
| $\text{CO}_2 + 3\text{H}_2 \rightarrow \text{CH}_3\text{OH} + \text{H}_2\text{O}$                       | -0.55                   | -0.22                   | 0.33  | -0.55                   | 0.00  |
| $\text{CO} + 2\text{H}_2 \rightarrow \text{CH}_3\text{OH}$                                              | -0.98                   | -1.03                   | -0.05 | -1.03                   | -0.05 |
| $3\text{H}_2 + \text{CO}_2 \rightarrow 1/2\text{CH}_3\text{CH}_2\text{OH} + 3/2\text{H}_2\text{O}$      | -0.89                   | -0.62                   | 0.27  | -0.95                   | -0.06 |
| $2\text{H}_2 + \text{CO} \rightarrow 1/2\text{CH}_3\text{CH}_2\text{OH} + 1/2\text{H}_2\text{O}$        | -1.32                   | -1.42                   | -0.10 | -1.42                   | -0.10 |
| $10/3\text{H}_2 + \text{CO}_2 \rightarrow 1/3\text{C}_3\text{H}_8 + 2\text{H}_2\text{O}$                | -1.3                    | -0.98                   | 0.32  | -1.31                   | -0.01 |
| $7/3\text{H}_2 + \text{CO} \rightarrow 1/3\text{C}_3\text{H}_8 + \text{H}_2\text{O}$                    | -1.72                   | -1.79                   | -0.07 | -1.79                   | -0.07 |
| $7/2\text{H}_2 + \text{CO}_2 \rightarrow 1/2\text{C}_2\text{H}_6 + 2\text{H}_2\text{O}$                 | -1.37                   | -1.06                   | 0.31  | -1.39                   | -0.02 |
| $5/2\text{H}_2 + \text{CO} \rightarrow 1/2\text{C}_2\text{H}_6 + \text{H}_2\text{O}$                    | -1.8                    | -1.87                   | -0.07 | -1.87                   | -0.07 |
| $3\text{H}_2 + \text{CO}_2 \rightarrow 1/2\text{C}_2\text{H}_4 + 2\text{H}_2\text{O}$                   | -0.66                   | -0.36                   | 0.30  | -0.69                   | -0.03 |
| $2\text{H}_2 + \text{CO} \rightarrow 1/2\text{C}_2\text{H}_4 + \text{H}_2\text{O}$                      | -1.09                   | -1.17                   | -0.08 | -1.17                   | -0.08 |
| $11/4\text{H}_2 + \text{CO}_2 \rightarrow 1/4\text{CH}_2=\text{CHCH}=\text{CH}_2 + 2\text{H}_2\text{O}$ | -0.65                   | -0.33                   | 0.32  | -0.66                   | -0.01 |
| $7/4\text{H}_2 + \text{CO} \rightarrow 1/4\text{CH}_2=\text{CHCH}=\text{CH}_2 + \text{H}_2\text{O}$     | -1.08                   | -1.13                   | -0.05 | -1.13                   | -0.05 |
| $2\text{H}_2 + \text{CO}_2 \rightarrow 1/2\text{CH}_3\text{COOH} + \text{H}_2\text{O}$                  | -0.67                   | -0.47                   | 0.20  | -0.64                   | 0.03  |
| $\text{H}_2 + \text{CO} \rightarrow 1/2\text{CH}_3\text{COOH}$                                          | -1.10                   | -1.28                   | -0.18 | -1.11                   | -0.01 |
| $2\text{H}_2 + \text{CO}_2 \rightarrow 1/2\text{HCOOCH}_3 + \text{H}_2\text{O}$                         | -0.17                   | -0.11                   | 0.06  | -0.28                   | -0.11 |
| $\text{H}_2 + \text{CO} \rightarrow 1/2\text{HCOOCH}_3$                                                 | -0.60                   | -0.92                   | -0.32 | -0.76                   | -0.16 |

**Table S2** The binding energy ( $E_b$ ) and cohesive energy ( $E_c$ ). All values are in eV.

| TM@TAP | ${}^1E_b$ | ${}^2E_c$ |
|--------|-----------|-----------|
| Sc     | -9.35     | -4.36     |
| Ti     | -9.03     | -5.60     |
| V      | -8.47     | -5.61     |
| Cr     | -7.38     | -4.05     |
| Mn     | -6.57     | -3.49     |
| Fe     | -6.86     | -4.75     |
| Co     | -7.28     | -5.39     |
| Ni     | -7.01     | -4.91     |
| Cu     | -5.40     | -3.70     |
| Zn     | -4.09     | -1.25     |
| Y      | -9.18     | -4.30     |
| Zr     | -9.69     | -6.32     |
| Nb     | -8.78     | -7.10     |
| Mo     | -8.80     | -7.38     |
| Tc     | -10.83    | -9.48     |
| Ru     | -8.15     | -6.77     |
| Rh     | -8.30     | -6.10     |
| Pd     | -6.18     | -3.91     |
| Ag     | -3.96     | -2.74     |
| Cd     | -3.38     | -0.88     |

${}^1E_b$  is computed by  $E_b = E_{\text{TM@TAP}} - E_{\text{TM}} - E_{\text{TAP}}$ .

${}^2E_c$  is calculated by  $E_c = E_{\text{TM, bulk}}/n - E_{\text{TM}}$ , where  $E_{\text{TM, bulk}}$  is the energy of metal crystal,  $n$  represents the number of metal atoms in its corresponding crystal, and  $E_{\text{TM}}$  is the energy of single metal atom.

**Table S3** Adsorption energy ( $\Delta E_{\text{ads}}$ ) of different products for CO<sub>2</sub>RR.

| TM@TAP | CO    | HCOOH | HCHO  | CH <sub>3</sub> OH | CH <sub>4</sub> |
|--------|-------|-------|-------|--------------------|-----------------|
| Cr     | -0.28 | -0.49 | -0.36 | -0.47              | -0.15           |
| Mn     | -0.36 | -0.70 | -0.55 | -0.69              | -0.22           |
| Fe     | -1.12 | -0.52 | -0.45 | -0.56              | -0.20           |
| Co     | -0.77 | -0.44 | -0.37 | -0.49              | -0.16           |
| Zn     | -0.19 | -0.59 | -0.46 | -0.63              | -0.19           |
| Mo     | -1.72 | -0.39 | -1.21 | -0.25              | -0.13           |
| Tc     | -2.16 | -0.42 | -0.35 | -0.44              | -0.17           |
| Ru     | -2.08 | -0.41 | -0.37 | -0.44              | -0.16           |
| Rh     | -0.34 | -0.36 | -0.28 | -0.32              | -0.10           |
| Cd     | -0.17 | -0.52 | -0.42 | -0.55              | -0.19           |

**Table S4** Zero-point energy (ZPE, in eV), entropy corrections (TS, in eV) and enthalpy corrections ( $\int C_p dT$ , in eV) at T = 298.15 K for gaseous molecules. ZPE and S are from NIST.<sup>9</sup>

| Species            | ZPE  | TS   | $\int C_p dT$ |
|--------------------|------|------|---------------|
| CO <sub>2</sub>    | 0.31 | 0.66 | 0.09          |
| CH <sub>4</sub>    | 1.18 | 0.58 | 0.10          |
| H <sub>2</sub> O   | 0.56 | 0.58 | 0.10          |
| H <sub>2</sub>     | 0.27 | 0.40 | 0.09          |
| CO                 | 0.13 | 0.61 | 0.09          |
| HCOOH              | 0.89 | 0.77 | 0.11          |
| HCHO               | 0.70 | 0.68 | 0.10          |
| CH <sub>3</sub> OH | 1.35 | 0.74 | 0.12          |

**Table S5** Zero-point energy (ZPE), entropy corrections (TS) and enthalpy corrections ( $\int C_p dT$ ) at T = 298.15 K for adsorbed species. All values are in eV.

| Sc@TAP | ZPE  | TS   | $\int C_p dT$ |
|--------|------|------|---------------|
| *H     | 0.14 | 0.03 | 0.02          |
| *COOH  | 0.61 | 0.29 | 0.12          |
| *OCHO  | 0.61 | 0.24 | 0.11          |
| *OH    | 0.31 | 0.17 | 0.08          |
| Ti@TAP | ZPE  | TS   | $\int C_p dT$ |
| *H     | 0.23 | 0.01 | 0.01          |
| *COOH  | 0.62 | 0.22 | 0.11          |
| *OCHO  | 0.59 | 0.30 | 0.12          |
| *OH    | 0.32 | 0.17 | 0.07          |
| V@TAP  | ZPE  | TS   | $\int C_p dT$ |
| *H     | 0.16 | 0.02 | 0.01          |
| *COOH  | 0.62 | 0.25 | 0.11          |
| *OCHO  | 0.60 | 0.25 | 0.11          |
| *OH    | 0.34 | 0.10 | 0.06          |
| Cr@TAP | ZPE  | TS   | $\int C_p dT$ |
| *H     | 0.17 | 0.02 | 0.01          |
| *COOH  | 0.61 | 0.25 | 0.11          |
| *OCHO  | 0.60 | 0.26 | 0.11          |
| *CO    | 0.16 | 0.24 | 0.10          |

|                     |      |      |               |
|---------------------|------|------|---------------|
| *HCOOH              | 0.91 | 0.34 | 0.13          |
| *OH                 | 0.33 | 0.15 | 0.07          |
| <hr/>               |      |      |               |
| Mn@TAP              | ZPE  | TS   | $\int C_p dT$ |
| *H                  | 0.15 | 0.03 | 0.02          |
| *COOH               | 0.62 | 0.23 | 0.11          |
| *OCHO               | 0.59 | 0.27 | 0.12          |
| *CO                 | 0.16 | 0.26 | 0.09          |
| *HCOOH              | 0.92 | 0.27 | 0.12          |
| *COH                | 0.47 | 0.15 | 0.08          |
| *CHO                | 0.45 | 0.19 | 0.09          |
| *OH                 | 0.31 | 0.16 | 0.07          |
| <hr/>               |      |      |               |
| Fe@TAP              | ZPE  | TS   | $\int C_p dT$ |
| *H                  | 0.20 | 0.01 | 0.01          |
| *COOH               | 0.63 | 0.21 | 0.10          |
| *OCHO               | 0.61 | 0.23 | 0.10          |
| *CO                 | 0.22 | 0.14 | 0.06          |
| *COH                | 0.47 | 0.12 | 0.07          |
| *CHO                | 0.47 | 0.17 | 0.08          |
| *CHOH               | 0.82 | 0.14 | 0.07          |
| *CH                 | 0.31 | 0.09 | 0.05          |
| *CH <sub>2</sub> OH | 1.11 | 0.18 | 0.09          |
| *CH <sub>2</sub>    | 0.64 | 0.10 | 0.05          |



|                     |      |      |               |
|---------------------|------|------|---------------|
| *CH <sub>3</sub> OH | 1.41 | 0.29 | 0.13          |
| *OH                 | 0.32 | 0.15 | 0.07          |
| <hr/>               |      |      |               |
| Co@TAP              | ZPE  | TS   | $\int C_p dT$ |
| *H                  | 0.20 | 0.01 | 0.01          |
| *COOH               | 0.64 | 0.20 | 0.10          |
| *OCHO               | 0.58 | 0.25 | 0.11          |
| *CO                 | 0.19 | 0.20 | 0.08          |
| *COH                | 0.47 | 0.16 | 0.08          |
| *CHO                | 0.48 | 0.17 | 0.08          |
| *CHOH               | 0.80 | 0.14 | 0.07          |
| *OCH <sub>2</sub>   | 0.76 | 0.23 | 0.11          |
| *OH                 | 0.34 | 0.11 | 0.06          |
| <hr/>               |      |      |               |
| Ni@TAP              | ZPE  | TS   | $\int C_p dT$ |
| *H                  | 0.15 | 0.02 | 0.01          |
| *COOH               | 0.62 | 0.22 | 0.11          |
| *OCHO               | 0.60 | 0.25 | 0.11          |
| <hr/>               |      |      |               |
| Cu@TAP              | ZPE  | TS   | $\int C_p dT$ |
| *H                  | 0.13 | 0.03 | 0.02          |
| *COOH               | 0.60 | 0.27 | 0.12          |
| *OCHO               | 0.56 | 0.30 | 0.12          |
| <hr/>               |      |      |               |
| Zn@TAP              | ZPE  | TS   | $\int C_p dT$ |

|        |      |      |               |
|--------|------|------|---------------|
| *H     | 0.16 | 0.02 | 0.02          |
| *COOH  | 0.60 | 0.27 | 0.12          |
| *OCHO  | 0.60 | 0.27 | 0.11          |
| *HCOOH | 0.92 | 0.31 | 0.13          |
| *OH    | 0.32 | 0.16 | 0.07          |
| <hr/>  |      |      |               |
| Y@TAP  | ZPE  | TS   | $\int C_p dT$ |
| *H     | 0.13 | 0.03 | 0.02          |
| *COOH  | 0.60 | 0.29 | 0.12          |
| *OCHO  | 0.60 | 0.29 | 0.12          |
| *OH    | 0.32 | 0.15 | 0.07          |
| <hr/>  |      |      |               |
| Zr@TAP | ZPE  | TS   | $\int C_p dT$ |
| *H     | 0.16 | 0.02 | 0.02          |
| *COOH  | 0.61 | 0.26 | 0.11          |
| *OCHO  | 0.61 | 0.24 | 0.11          |
| *OH    | 0.31 | 0.18 | 0.08          |
| <hr/>  |      |      |               |
| Nb@TAP | ZPE  | TS   | $\int C_p dT$ |
| *H     | 0.17 | 0.02 | 0.01          |
| *COOH  | 0.62 | 0.23 | 0.11          |
| *OCHO  | 0.62 | 0.21 | 0.10          |
| *OH    | 0.33 | 0.13 | 0.06          |

| Mo@TAP | ZPE  | TS   | $\int C_p dT$ |
|--------|------|------|---------------|
| *H     | 0.17 | 0.02 | 0.02          |
| *COOH  | 0.61 | 0.28 | 0.12          |
| *OCHO  | 0.60 | 0.26 | 0.11          |
| *CO    | 0.21 | 0.15 | 0.07          |
| *HCOOH | 0.93 | 0.27 | 0.12          |
| *COH   | 0.48 | 0.18 | 0.09          |
| *CHO   | 0.45 | 0.21 | 0.09          |
| *OH    | 0.33 | 0.15 | 0.07          |

  

| Tc@TAP              | ZPE  | TS   | $\int C_p dT$ |
|---------------------|------|------|---------------|
| *H                  | 0.20 | 0.01 | 0.01          |
| *COOH               | 0.62 | 0.22 | 0.11          |
| *OCHO               | 0.63 | 0.18 | 0.10          |
| *CO                 | 0.22 | 0.14 | 0.06          |
| *COH                | 0.49 | 0.19 | 0.09          |
| *CHO                | 0.46 | 0.19 | 0.08          |
| *CHOH               | 0.81 | 0.15 | 0.08          |
| *OCH <sub>2</sub>   | 0.74 | 0.29 | 0.12          |
| *CH                 | 0.36 | 0.07 | 0.04          |
| *CH <sub>2</sub> OH | 1.10 | 0.21 | 0.10          |
| *CH <sub>2</sub>    | 0.63 | 0.10 | 0.06          |
| *CH <sub>3</sub> OH | 1.40 | 0.33 | 0.14          |

|                  |      |      |      |
|------------------|------|------|------|
| *CH <sub>3</sub> | 0.96 | 0.13 | 0.07 |
| *OH              | 0.96 | 0.13 | 0.07 |

---

| Ru@TAP              | ZPE  | TS   | $\int C_p dT$ |
|---------------------|------|------|---------------|
| *H                  | 0.21 | 0.01 | 0.01          |
| *COOH               | 0.63 | 0.22 | 0.10          |
| *OCHO               | 0.61 | 0.25 | 0.11          |
| *CO                 | 0.22 | 0.13 | 0.06          |
| *COH                | 0.48 | 0.13 | 0.07          |
| *CHO                | 0.48 | 0.17 | 0.08          |
| *CHOH               | 0.82 | 0.14 | 0.07          |
| *OCH <sub>2</sub>   | 0.79 | 0.16 | 0.08          |
| *CH                 | 0.30 | 0.11 | 0.05          |
| *CH <sub>2</sub> OH | 1.11 | 0.20 | 0.09          |
| *CH <sub>2</sub>    | 0.64 | 0.09 | 0.05          |
| *CH <sub>3</sub> OH | 1.40 | 0.31 | 0.13          |
| *CH <sub>3</sub>    | 0.96 | 0.14 | 0.07          |
| *OH                 | 0.35 | 0.11 | 0.06          |

---

| Rh@TAP | ZPE  | TS   | $\int C_p dT$ |
|--------|------|------|---------------|
| *H     | 0.21 | 0.01 | 0.01          |
| *COOH  | 0.64 | 0.20 | 0.10          |
| *OCHO  | 0.59 | 0.24 | 0.11          |
| *CO    | 0.18 | 0.19 | 0.08          |

|        |      |      |               |
|--------|------|------|---------------|
| *OH    | 0.34 | 0.13 | 0.06          |
| <hr/>  |      |      |               |
| Pd@TAP | ZPE  | TS   | $\int C_p dT$ |
| *H     | 0.12 | 0.02 | 0.02          |
| *COOH  | 0.63 | 0.22 | 0.11          |
| *OCHO  | 0.53 | 0.35 | 0.13          |
| <hr/>  |      |      |               |
| Ag@TAP | ZPE  | TS   | $\int C_p dT$ |
| *H     | 0.11 | 0.05 | 0.03          |
| *COOH  | 0.59 | 0.32 | 0.13          |
| *OCHO  | 0.54 | 0.35 | 0.13          |
| <hr/>  |      |      |               |
| Cd@TAP | ZPE  | TS   | $\int C_p dT$ |
| *H     | 0.14 | 0.04 | 0.02          |
| *COOH  | 0.59 | 0.31 | 0.13          |
| *OCHO  | 0.59 | 0.30 | 0.12          |
| *HCOOH | 0.92 | 0.29 | 0.13          |
| *OH    | 0.31 | 0.18 | 0.08          |
| <hr/>  |      |      |               |

**Table S6** The products,  $\Delta G_{\max}$ , adsorption energy ( $\Delta E_{\text{ads}}$ ) of some intermediates, and magnetic moment of ten catalysts.

| TM@TAP | Products           | $\Delta G_{\max}$<br>(eV) | $\Delta E_{\text{ads}}(*\text{CO})$<br>(eV) | $\Delta E_{\text{ads}}(*\text{OH})$<br>(eV) | $\Delta E_{\text{ads}}(*\text{OCHO})$<br>(eV) | $\Delta E_{\text{ads}}(*\text{COOH})$<br>(eV) | $\Delta E_{\text{ads}}(*\text{CHO})$<br>(eV) | Magnetic<br>moment<br>( $\mu_{\text{B}}$ ) |
|--------|--------------------|---------------------------|---------------------------------------------|---------------------------------------------|-----------------------------------------------|-----------------------------------------------|----------------------------------------------|--------------------------------------------|
| Cr     | HCOOH              | 0.33                      | -0.28                                       | 0.16                                        | -0.07                                         | 0.33                                          | -0.34                                        | 3.77                                       |
| Mn     | CO                 | 0.73                      | -0.36                                       | 0.23                                        | -0.20                                         | 0.54                                          | -0.34                                        | 4.59                                       |
| Fe     | CH <sub>3</sub> OH | 0.51                      | -1.12                                       | 0.43                                        | 0.29                                          | 0.03                                          | -0.87                                        | 1.41                                       |
| Co     | HCHO               | 0.36                      | -0.77                                       | 0.85                                        | 0.39                                          | -0.02                                         | -0.94                                        | 0.40                                       |
| Zn     | HCOOH              | 0.57                      | -0.19                                       | 0.87                                        | 0.18                                          | 1.08                                          | 0.50                                         | 0.00                                       |
| Mo     | HCOOH              | 0.50                      | -1.72                                       | -0.50                                       | -0.67                                         | -0.32                                         | -0.99                                        | 3.52                                       |
| Tc     | CH <sub>4</sub>    | 1.04                      | -2.16                                       | -0.12                                       | 0.45                                          | -0.30                                         | -1.35                                        | 2.47                                       |
| Ru     | CH <sub>4</sub>    | 0.65                      | -2.08                                       | 0.10                                        | -0.27                                         | -0.82                                         | -1.68                                        | 1.18                                       |
| Rh     | CO                 | 0.28                      | -0.34                                       | 1.19                                        | 0.67                                          | -0.25                                         | -1.12                                        | 0.00                                       |
| Cd     | HCOOH              | 0.71                      | -0.17                                       | 1.20                                        | 0.35                                          | 1.29                                          | 0.67                                         | 0.00                                       |

$$\Delta E_{\text{ads}}(*\text{CO}) = E(*\text{CO}) - E(*) - E(\text{CO});$$

$$\Delta E_{\text{ads}}(*\text{OH}) = E(*\text{OH}) - E(*) - (E(\text{H}_2\text{O}) - 1/2 \times E(\text{H}_2));$$

$$\Delta E_{\text{ads}}(*\text{OCHO}) = E(*\text{OCHO}) - E(*) - (E(\text{CO}_2) + 1/2 \times E(\text{H}_2));$$

$$\Delta E_{\text{ads}}(*\text{COOH}) = E(*\text{COOH}) - E(*) - (E(\text{CO}_2) + 1/2 \times E(\text{H}_2));$$

$$\Delta E_{\text{ads}}(*\text{CHO}) = E(*\text{CHO}) - E(*) - (E(\text{CO}) + 1/2 \times E(\text{H}_2));$$

where E(\*) stands for the energy of catalyst.

## References

- 1 D. W. Blaylock, T. Ogura, W. H. Green and G. J. O. Beran, *J. Phys. Chem. C*, 2009, **113**, 4898-4908.
- 2 A. A. Peterson, F. Abild-Pedersen, F. Studt, J. Rossmeisl and J. K. Nørskov, *Energy Environ. Sci.*, 2010, **3**, 1311-1315.
- 3 G. Zhu, Y. Li, H. Zhu, H. Su, S. H. Chan and Q. Sun, *ACS Catal.*, 2016, **6**, 294-6301.
- 4 Y. Li, H. Su, S. H. Chan and Q. Sun, *ACS Catal.*, 2015, **5**, 6658-6664.
- 5 Y. Jiao, Y. Zheng, P. Chen, M. Jaroniec and S. -Z. Qiao, *J. Am. Chem. Soc.*, 2017, **139**, 18093-18100.
- 6 X. Cui, W. An, X. Liu, H. Wang, Y. Men and J. Wang, *Nanoscale*, 2018, **10**, 15262-15272.
- 7 S. Back, J. Lim, N. Y. Kim, Y. -H. Kim and Y. Jung, *Chem. Sci.*, 2017, **8**, 1090-1096.
- 8 W. J. Durand, A. A. Peterson, F. Studt, F. Abild-Pedersen and J. K. Nørskov, *Surf. Sci.*, 2011, **605**, 1354-1359.
- 9 Computational Chemistry Comparison and Benchmark Database. <http://cccbdb.nist.gov/>.
